# Supplementary material
Source: Springer Nature journal article supplement (https://www.springermedizin.de/resource/supplementary/12889_2007_870_MOESM3_ESM.pdf/9501954)
Supplement: MOESM3 [file 9501954]

|                       | monday      | tuesday     | wednesday   | thursday    | friday      | saturday    | sunday      |
|-----------------------|-------------|-------------|-------------|-------------|-------------|-------------|-------------|
| Moderate intensity PA | ... minutes |
| Sports                | ... minutes |

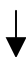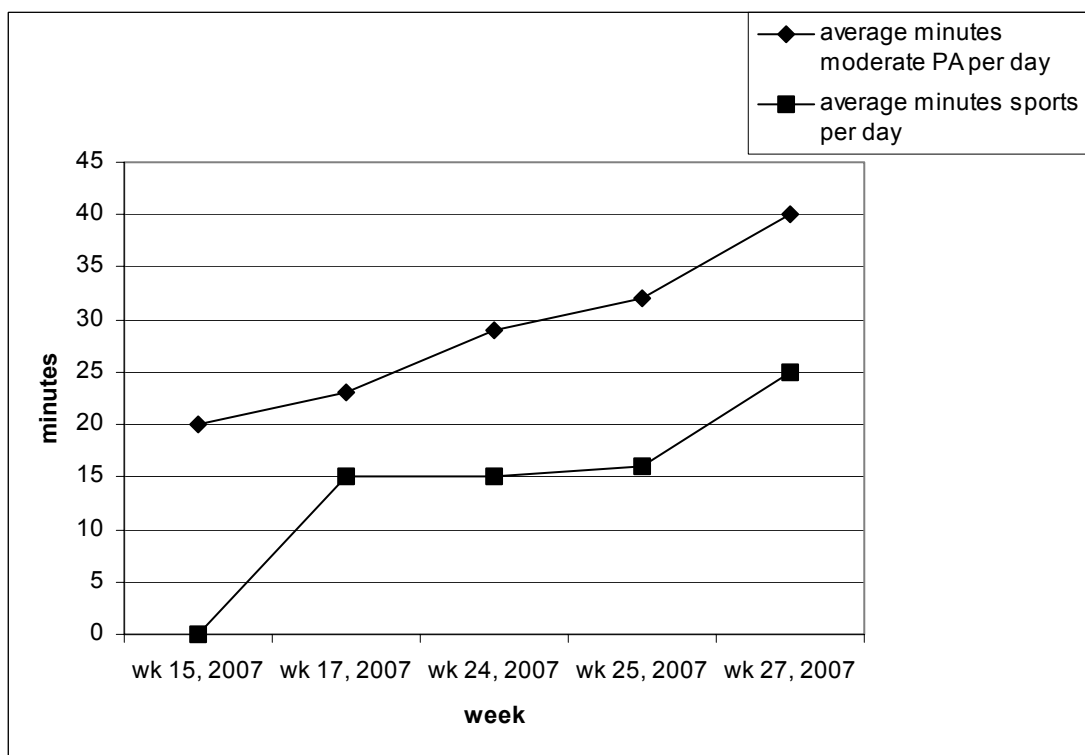

The monitoring function regarding fruit and vegetable consumption and weight (BMI) will work in a similar manner.
